# Supplementary material
Source: PubMed Central journal article supplement (PMC9360249)
Supplement: ajcr0012-3318-f6.pdf [file ajcr0012-3318-f6.pdf]

## A novel 8-gene panel for PCa early BCR prediction

**Supplementary Table 1.** List of the genes in three commercial panels for PCa risk-stratification

| Test       | Biomarkers | Genes                                                                                                                                                                                                                                                                                                                                                | Ref    |
|------------|------------|------------------------------------------------------------------------------------------------------------------------------------------------------------------------------------------------------------------------------------------------------------------------------------------------------------------------------------------------------|--------|
| OncotypeDx | 17 genes   | <i>BGN, COL1A1, SFRP4, FLNC, GSN, TPM2, GSTM2, GAM13C, KLK2, AZGP1, SRD5A2, TPX2, ARF1, ATP5E, CLTC, GPS1, PGK1</i>                                                                                                                                                                                                                                  | [1-3]  |
| Decipher   | 22 genes   | <i>LASP1, IQGAP3, NFIB, S1PR4, THBS2, ANO7, PCDH7, MYBPC1, EPPK1, TSBP, PBX1, NUSAP1, ZWILCH, UBE2C, CANK2N1, RABGAP1, PCAT-32, GLYATL1P4/PCAT-80, TNFRSF19</i>                                                                                                                                                                                      | [4-7]  |
| Prolaris   | 46 genes   | <i>FOXM1, CDC20, CDKN3, CDC2, KIF11, KIAA0101, NUSAP1, CENPF, ASPM, BUB1B, RRM2, DLGAP5, BIRC5, KIF20A, PLK1, TOP2A, TK1, PBK, ASF1B, C18orf24, RAD54L, PTTG1, CDCA3, MCM10, PRC1, DTL, CEP55, RAD51, CENPM, CDCA8, ORC6L, RPL38, UBA52, PSMC1, RPL4, RPL37, RPS29, SLC25A3, CLTC, TXNL1, PSMA1, RPL8, MMADHC, RPL13A, LOC728658, PPP2CA, MRFAP1</i> | [8-12] |

**Supplementary Table 2.** The AUC values of the 8-gene signature and three commercial panels for predicting 1-, 2- and 3-year BFS

| Panel                 | 1 year-AUC      | p value | 2 year-AUC      | p value | 3 year-AUC      | p value |
|-----------------------|-----------------|---------|-----------------|---------|-----------------|---------|
| 8-gene vs. Decipher   | 0.737 vs. 0.612 | 0.226   | 0.760 vs. 0.619 | 0.074   | 0.737 vs. 0.702 | 0.563   |
| 8-gene vs. OncotypeDx | 0.737 vs. 0.712 | 0.776   | 0.760 vs. 0.698 | 0.347   | 0.737 vs. 0.761 | 0.651   |
| 8-gene vs. Prolaris   | 0.737 vs. 0.718 | 0.820   | 0.760 vs. 0.726 | 0.616   | 0.737 vs. 0.784 | 0.376   |

# A novel 8-gene panel for PCa early BCR prediction

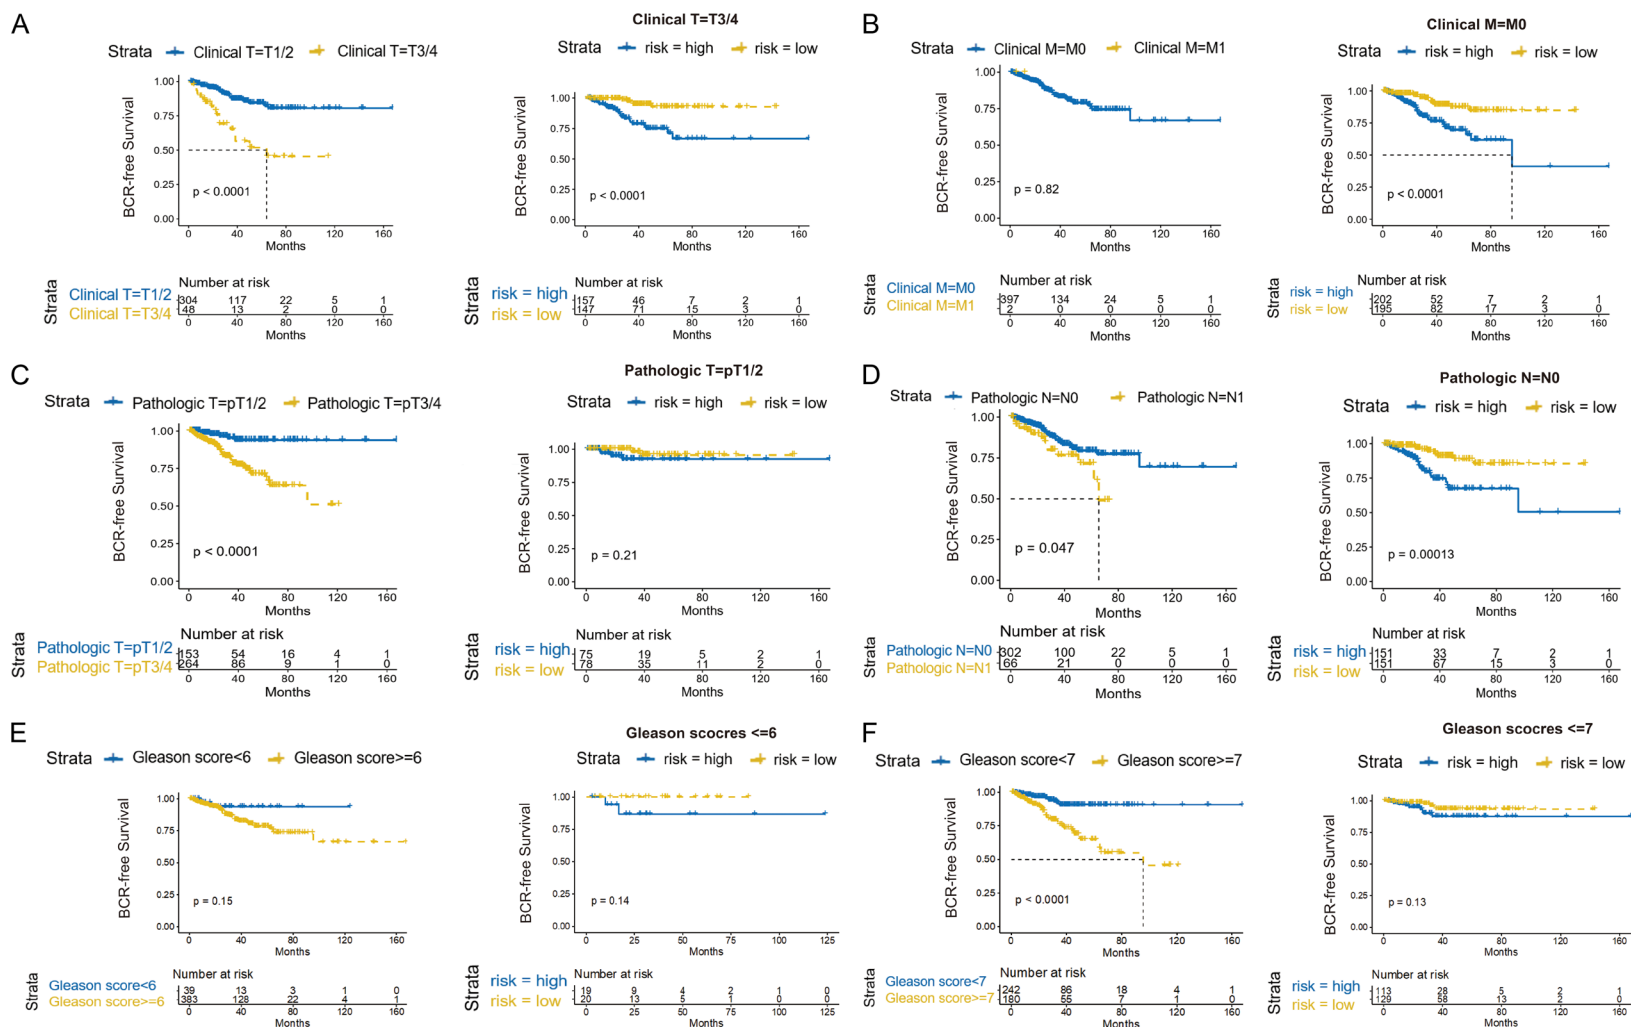

**Supplementary Figure 1.** Performance evaluation of the 8-gene signature in the subgroups stratified according to TNM status or Gleason score in the TCGA cohort. Kaplan-Meier BFS analyses of the 8-gene predicative model in the subgroup with clinical stage T1-2 PCa (A), clinical stage M0 PCa (B), pathologic stage T1-2 PCa (C), pathologic stage N0 PCa (D), or a Gleason score of ≤6 (E) or 7 (F). BFS: biochemical recurrence-free survival; TCGA: The Cancer Genome Atlas Project; PCa: prostate cancer.

# A novel 8-gene panel for PCa early BCR prediction

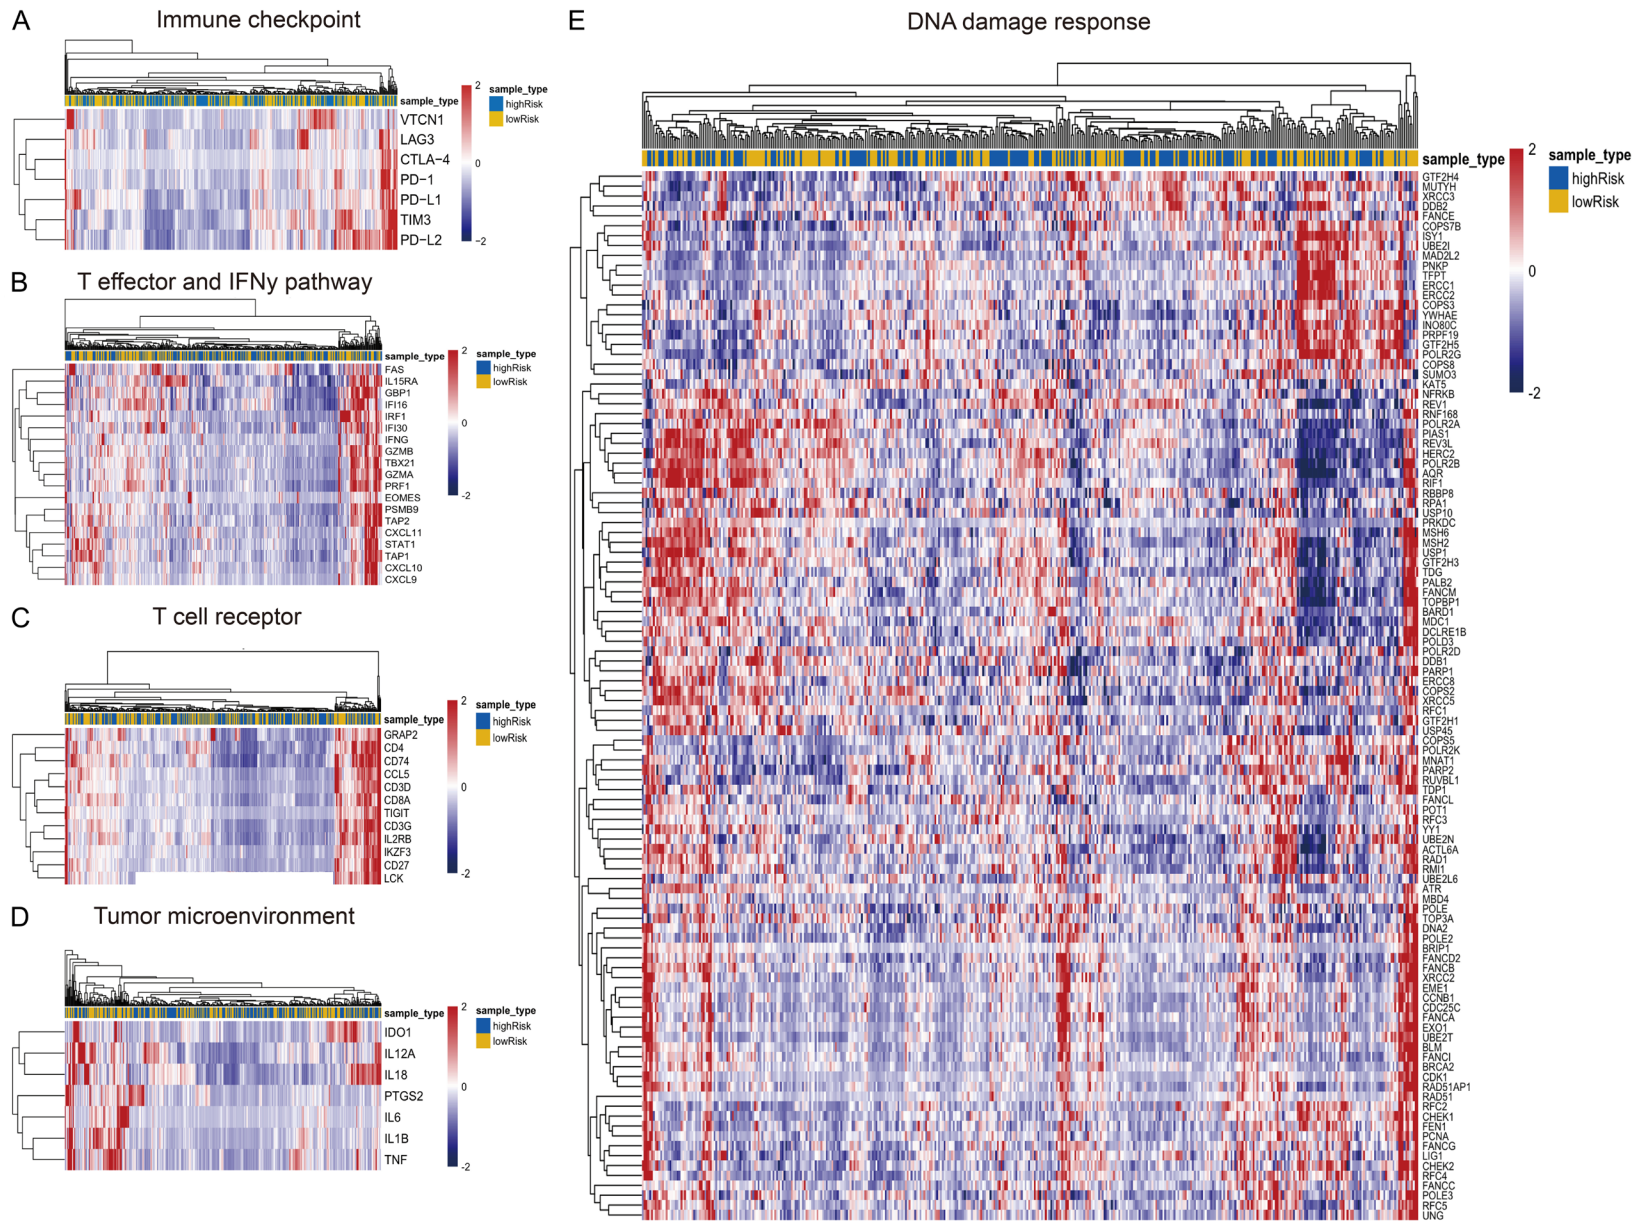

## A novel 8-gene panel for PCa early BCR prediction

**Supplementary Figure 2.** mRNA expression profiles of different gene classifications between high-risk and low-risk groups in the TCGA cohort. The heat maps show mRNA expression profiles of different gene classifications between high-risk and low-risk groups, including common immune checkpoints (A), representative genes of IFN $\gamma$  pathway, effector T cell (B), T cell receptor (C), and the tumor microenvironment (D), and DNA damage repair genes (E). TCGA: The Cancer Genome Atlas Project.

A

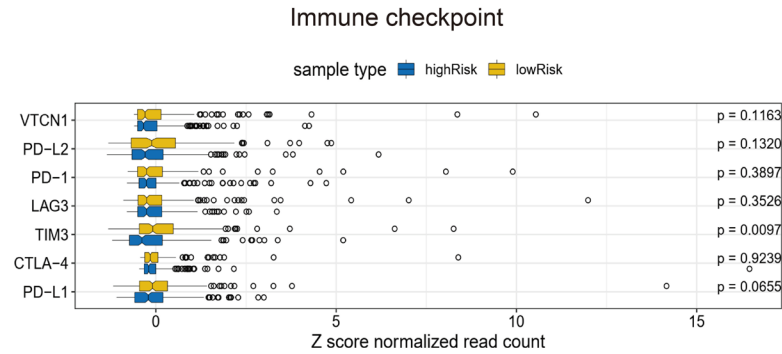

B

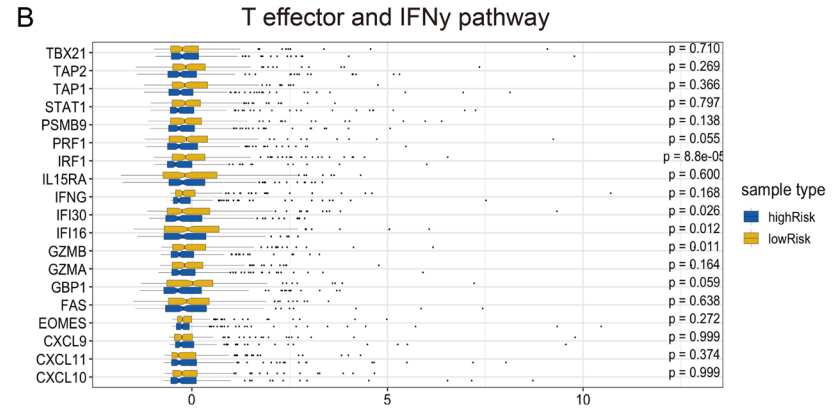

C

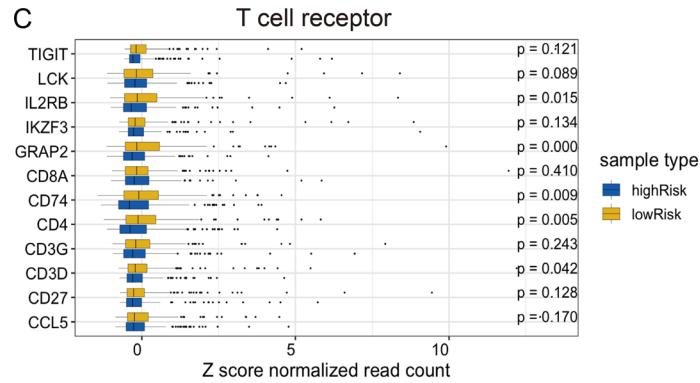

D

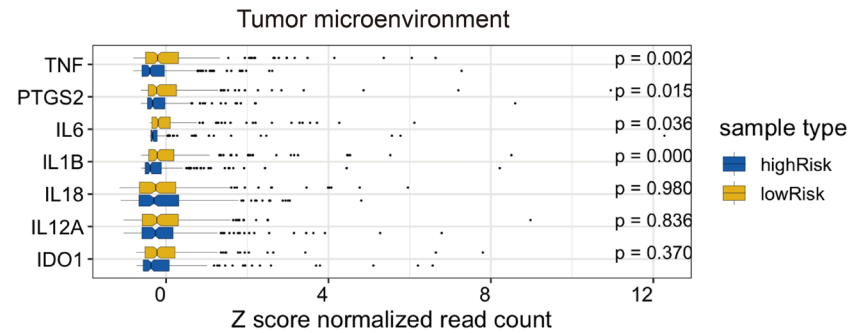



# A novel 8-gene panel for PCa early BCR prediction

F

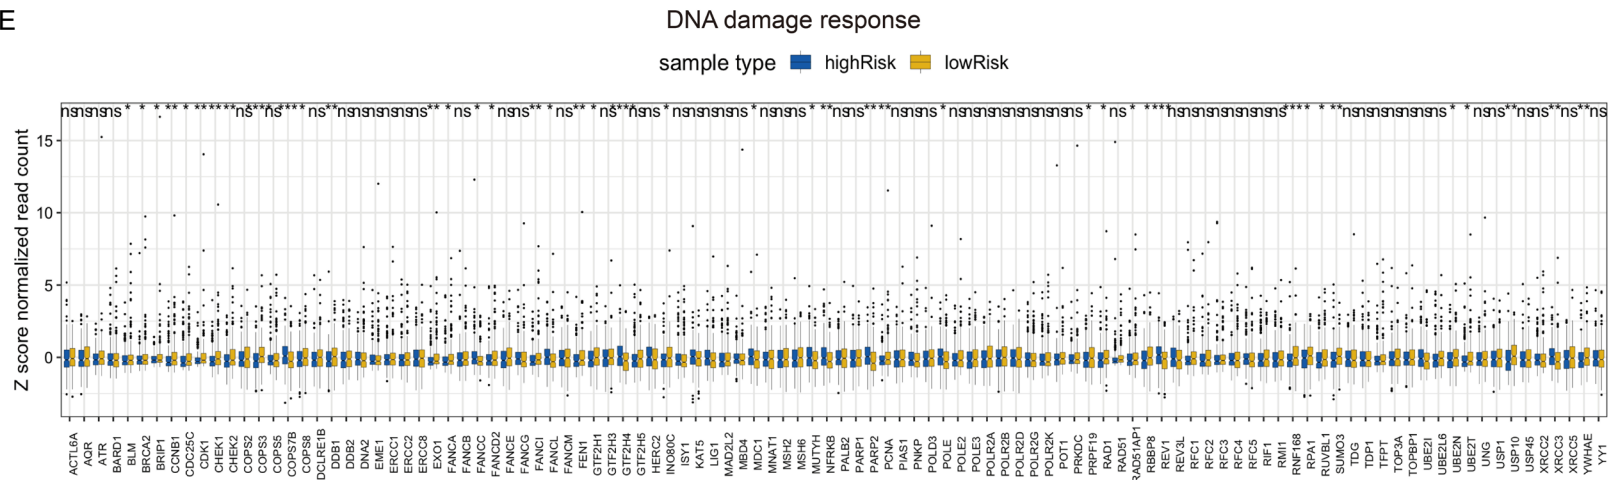

**Supplementary Figure 3.** Comparison of mRNA expression of different gene classifications between high-risk and low-risk groups in the TCGA cohort. The mRNA expression profiling analyses for common immune checkpoints (A), representative genes of IFN $\gamma$  pathway, effector T cell (B), T cell receptor (C), and the tumor microenvironment (D), and DNA damage repair genes (E) between the two risk groups. \* $P < 0.05$ , \*\* $P < 0.01$ , \*\*\* $P < 0.001$ , and \*\*\*\* $P < 0.0001$ . TCGA: The Cancer Genome Atlas Project.

## A novel 8-gene panel for PCa early BCR prediction

**Supplementary Table 3.** The differentially expressed DNA damage repair genes between the high-risk and low-risk groups in the TCGA cohort

| Gene     | P value     | High-risk    | Low-risk     |
|----------|-------------|--------------|--------------|
| BLM      | 0.029829042 | -0.103942574 | 0.112135092  |
| BRCA2    | 0.041661165 | -0.097468548 | 0.105150798  |
| BRIP1    | 0.019382566 | -0.113383545 | 0.122320179  |
| CCNB1    | 0.004667985 | -0.134548703 | 0.145153527  |
| CDC25C   | 0.030037404 | -0.102600358 | 0.110687085  |
| CDK1     | 0.005217301 | -0.134560353 | 0.145166095  |
| CHEK1    | 0.001822992 | -0.148519804 | 0.160225799  |
| CHEK2    | 0.001515887 | -0.150122304 | 0.161954603  |
| COPS3    | 1.22E-05    | -0.205155828 | 0.221325745  |
| COPS7B   | 0.000934291 | 0.154170673  | -0.166322056 |
| COPS8    | 0.024320428 | -0.10586488  | 0.11420891   |
| DDB1     | 0.005700649 | -0.129984756 | 0.140229859  |
| EXO1     | 0.004029355 | -0.13711129  | 0.147918091  |
| FANCA    | 0.028976696 | -0.103627351 | 0.111795024  |
| FANCC    | 0.013443946 | 0.113788324  | -0.122756862 |
| FANCD2   | 0.021192817 | -0.10931184  | 0.117927551  |
| FANCI    | 0.004434624 | -0.135842843 | 0.146549669  |
| FANCL    | 0.021431007 | 0.107706194  | -0.116195352 |
| FEN1     | 0.00713573  | -0.127940837 | 0.138024844  |
| GTF2H1   | 0.020075807 | -0.109635925 | 0.11827718   |
| GTF2H4   | 3.37E-06    | 0.214328168  | -0.231221029 |
| INO80C   | 0.017749556 | -0.111841635 | 0.120656739  |
| MDC1     | 0.042617574 | 0.095275714  | -0.102785129 |
| MUTYH    | 0.040772495 | 0.095478393  | -0.103003784 |
| NFRKB    | 0.002788265 | 0.138511415  | -0.149428571 |
| PARP2    | 0.00411484  | 0.134869937  | -0.14550008  |
| PCNA     | 0.002844698 | -0.142599687 | 0.153839071  |
| POLE     | 0.026184095 | 0.104749878  | -0.113006026 |
| PRPF19   | 0.029342079 | -0.102880734 | 0.11098956   |
| RAD1     | 0.046810852 | -0.093702158 | 0.10108755   |
| RAD51AP1 | 0.031127262 | -0.102810912 | 0.110914235  |
| RBBP8    | 0.024392086 | -0.105786426 | 0.114124273  |
| REV1     | 0.000253648 | 0.170397492  | -0.183827837 |
| RNF168   | 0.00072464  | -0.158764688 | 0.171278161  |
| RPA1     | 0.032319255 | -0.100279107 | 0.108182879  |
| RUVBL1   | 0.03174482  | -0.101103648 | 0.109072408  |
| SUMO3    | 0.005093212 | -0.130476075 | 0.140759904  |
| UBE2N    | 0.028733437 | -0.103123008 | 0.11125093   |
| UBE2T    | 0.026203703 | -0.10546642  | 0.113779044  |
| USP10    | 0.002250907 | -0.142820558 | 0.154077351  |
| XRCC3    | 0.005761013 | 0.129838086  | -0.14007163  |
| YWHAE    | 0.006637241 | -0.127494558 | 0.13754339   |

## A novel 8-gene panel for PCa early BCR prediction

### References

- [1] Cullen J, Rosner IL, Brand TC, Zhang N, Tsiatis AC, Moncur J, Ali A, Chen Y, Knezevic D, Maddala T, Lawrence HJ, Febbo PG, Srivastava S, Sesterhenn IA and McLeod DG. A biopsy-based 17-gene genomic prostate score predicts recurrence after radical prostatectomy and adverse surgical pathology in a racially diverse population of men with clinically low- and intermediate-risk prostate cancer. *Eur Urol* 2015; 68: 123-131.
- [2] Van Den Eeden SK, Lu R, Zhang N, Quesenberry CP, Shan J, Han JS, Tsiatis AC, Leimpeter AD, Lawrence HJ, Febbo PG and Presti JC. A Biopsy-based 17-gene genomic prostate score as a predictor of metastases and prostate cancer death in surgically treated men with clinically localized disease. *Eur Urol* 2018; 73: 129-138.
- [3] Klein EA, Yousefi K, Haddad Z, Choeurng V, Buerki C, Stephenson AJ, Li J, Kattan MW, Magi-Galluzzi C and Davicioni E. A genomic classifier improves prediction of metastatic disease within 5 years after surgery in node-negative high-risk prostate cancer patients managed by radical prostatectomy without adjuvant therapy. *Eur Urol* 2015; 67: 778-786.
- [4] Karnes RJ, Choeurng V, Ross AE, Schaeffer EM, Klein EA, Freedland SJ, Erho N, Yousefi K, Takhar M, Davicioni E, Cooperberg MR and Trock BJ. Validation of a genomic risk classifier to predict prostate cancer-specific mortality in men with adverse pathologic features. *Eur Urol* 2018; 73: 168-175.
- [5] Erho N, Crisan A, Vergara IA, Mitra AP, Ghadessi M, Buerki C, Bergstralh EJ, Kollmeyer T, Fink S, Haddad Z, Zimmermann B, Sierocinski T, Ballman KV, Triche TJ, Black PC, Karnes RJ, Klee G, Davicioni E and Jenkins RB. Discovery and validation of a prostate cancer genomic classifier that predicts early metastasis following radical prostatectomy. *PLoS One* 2013; 8: e66855.
- [6] Ross AE, Feng FY, Ghadessi M, Erho N, Crisan A, Buerki C, Sundi D, Mitra AP, Vergara IA, Thompson DJ, Triche TJ, Davicioni E, Bergstralh EJ, Jenkins RB, Karnes RJ and Schaeffer EM. A genomic classifier predicting metastatic disease progression in men with biochemical recurrence after prostatectomy. *Prostate Cancer Prostatic Dis* 2014; 17: 64-69.
- [7] Klein EA, Haddad Z, Yousefi K, Lam LL, Wang Q, Choeurng V, Palmer-Aronsten B, Buerki C, Davicioni E, Li J, Kattan MW, Stephenson AJ and Magi-Galluzzi C. Decipher genomic classifier measured on prostate biopsy predicts metastasis risk. *Urology* 2016; 90: 148-152.
- [8] Canter DJ, Freedland S, Rajamani S, Latsis M, Variano M, Halat S, Tward J, Cohen T, Stone S, Schlomm T, Bishoff J and Bardot S. Analysis of the prognostic utility of the cell cycle progression (CCP) score generated from needle biopsy in men treated with definitive therapy. *Prostate Cancer Prostatic Dis* 2020; 23: 102-107.
- [9] Cuzick J, Swanson GP, Fisher G, Brothman AR, Berney DM, Reid JE, Mesher D, Speights VO, Stankiewicz E, Foster CS, Møller H, Scardino P, Warren JD, Park J, Younus A, Flake DD, Wagner S, Gutin A, Lanchbury JS and Stone S. Prognostic value of an RNA expression signature derived from cell cycle proliferation genes in patients with prostate cancer: a retrospective study. *Lancet Oncol* 2011; 12: 245-255.
- [10] Bishoff JT, Freedland SJ, Gerber L, Tennstedt P, Reid J, Welbourn W, Graefen M, Sangale Z, Tikishvili E, Park J, Younus A, Gutin A, Lanchbury JS, Sauter G, Brawer M, Stone S and Schlomm T. Prognostic utility of the cell cycle progression score generated from biopsy in men treated with prostatectomy. *J Urol* 2014; 192: 409-414.
- [11] Freedland SJ, Choeurng V, Howard L, De Hoedt A, du Plessis M, Yousefi K, Lam LL, Buerki C, Ra S, Robbins B, Trabulsi EJ, Shah NL, Abdollah F, Feng FY, Davicioni E, Dicker AP, Karnes RJ and Den RB. Utilization of a genomic classifier for prediction of metastasis following salvage radiation therapy after radical prostatectomy. *Eur Urol* 2016; 70: 588-596.
- [12] Cooperberg MR, Davicioni E, Crisan A, Jenkins RB, Ghadessi M and Karnes RJ. Combined value of validated clinical and genomic risk stratification tools for predicting prostate cancer mortality in a high-risk prostatectomy cohort. *Eur Urol* 2015; 67: 326-333.
